# Supplementary material
Source: publisher figshare collection journal article supplement (https://frontiersin.figshare.com/ndownloader/files/14993213)

Figure S2. Expanded region of regular (A) and ct-HSQC (B) of fully-labelled *C. elegans* extracts.

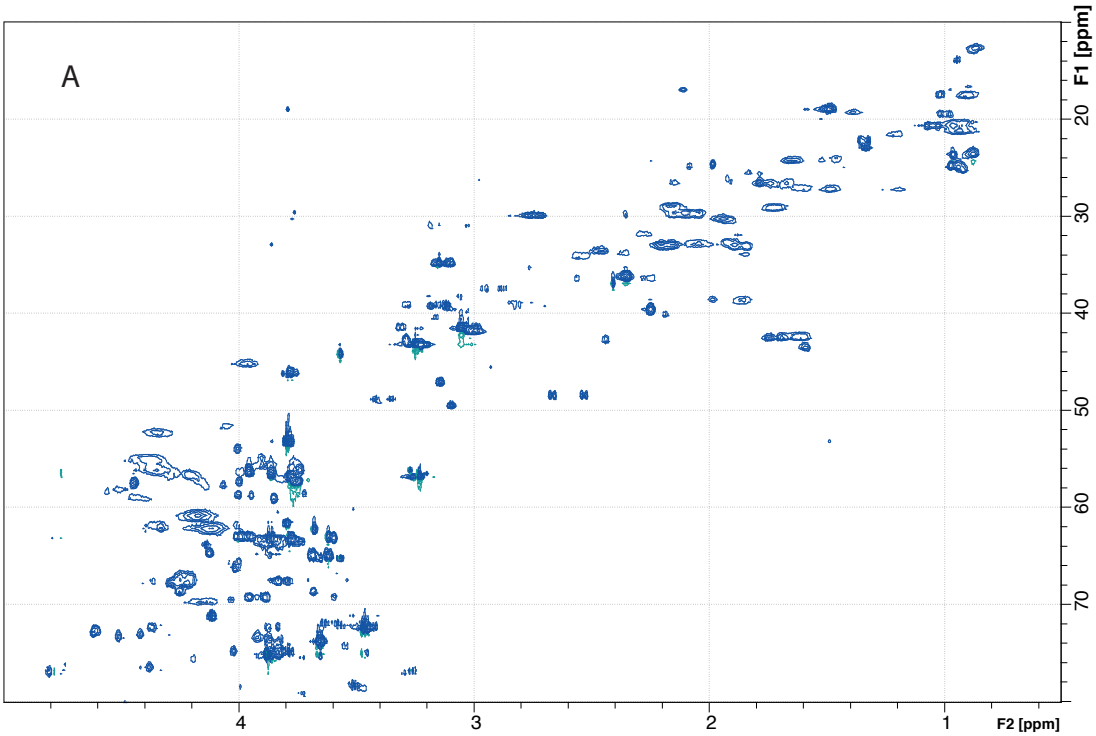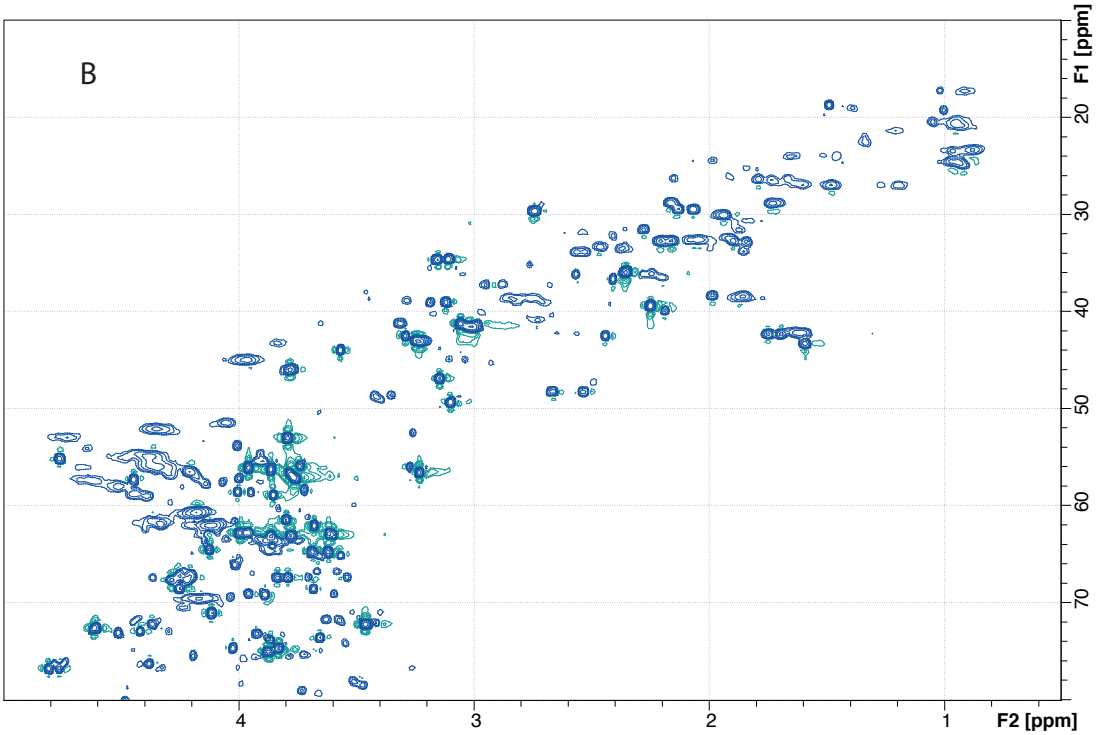

Supplement: Supplementary file [file 14993213]
